# Supplementary material for: X-ray absorption fine structure (XAFS)-based radionuclide research at the KIT Light Source
Source: Copernicus journal article supplement (doi:10.5194/sand-2-159-2023), 2023-09-06

Supplement of Saf. Nucl. Waste Disposal, 2, 159–160, 2023  
<https://doi.org/10.5194/sand-2-159-2023-supplement>  
© Author(s) 2023. CC BY 4.0 License.

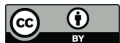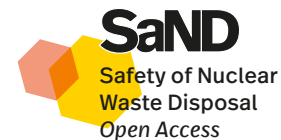

*Supplement of*

## **X-ray absorption fine structure (XAFS)-based radionuclide research at the KIT Light Source**

**Jörg Rothe**

*Correspondence to:* Jörg Rothe (rothe@kit.edu)

The copyright of individual parts of the supplement might differ from the article licence.

# Poster Session II / S11: X-ray absorption fine structure (XAFS) based radionuclide research at the KIT Light Source

In the past two decades, X-ray absorption spectroscopy (XAS) and related synchrotron-based radionuclide speciation techniques have become indispensable for supporting open issues in fundamental radiochemistry and nuclear waste disposal safety research alike. Specialized beamlines at the KIT Light Source provide:

- direct chemical *in situ* speciation of pristine nuclear materials - encompassing fragments of highly active nuclear waste forms
- analysis of samples with activities up to  $10^6$  times the exemption limits and 200 mg  $U^{235}/Pu^{239}$
- flexible containment concepts allowing to measure solids, liquids, gases and samples at non-ambient conditions
- a broad energy range from “tender” to hard X-rays
- worldwide unique infrastructure with close proximity between beamlines and radiochemistry labs / shielded box line on the same campus

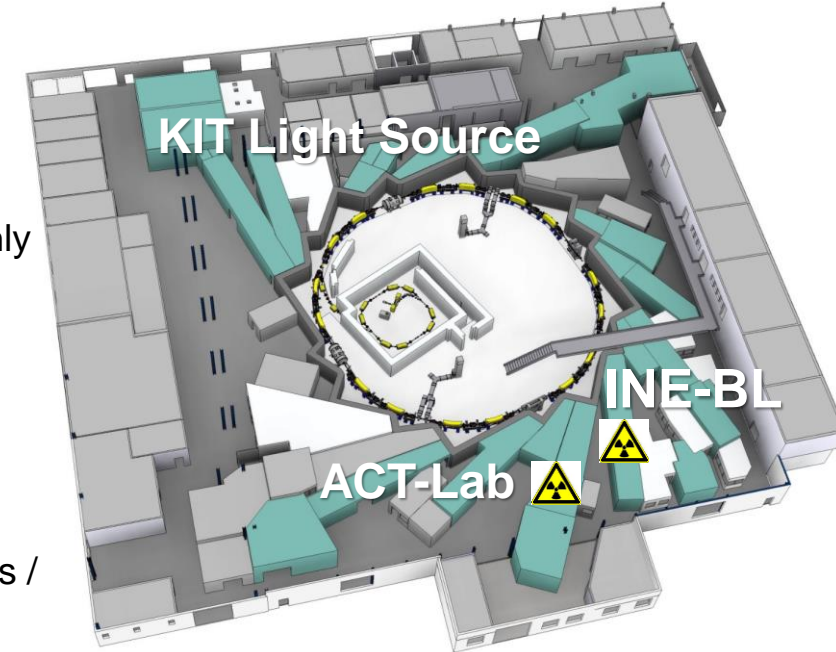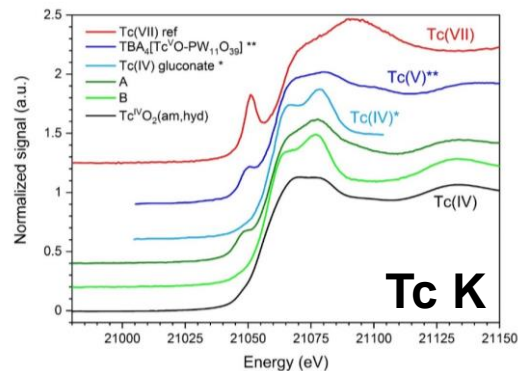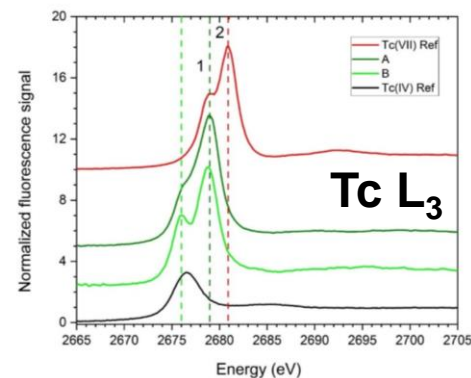

Dual-edge XAFS speciation of Tc(IV,V)-gluconate complexes

K. Dardenne et al.,  
Inorg. Chem. 2021

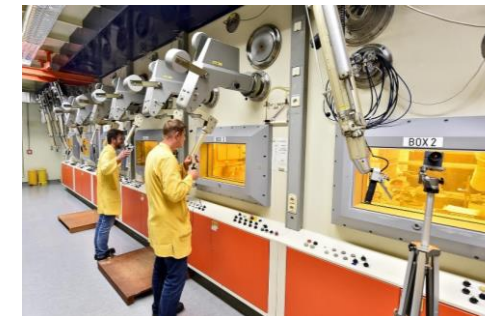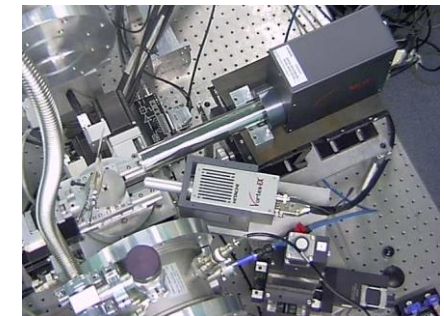

Supplement: Supplementary file 1 [file sand-2-159-2023-supplement.pdf]
